# Supplementary material
Source: publisher site journal article supplement (https://www.spandidos-publications.com/6797/downloadSupplementary)
Supplement: Supplementary file 1 [file downloadSupplementary]

## Sheet: Sheet1
Table SIV. piRNA correlation between tissue and plasma samples.
	Tissue				Plasma
piRNA	S156	S158	S113	CN1	S156	S158	S113	CN1	Pearson's coefficient	t-value	P-value
hsa-piR-13413	1.17862	2.41405	2.50184	0.92824	0.535575	0.518669	0.671302	0	0.735107	1.53344	0.264893
hsa-piR-13522	1.88578	4.13838	2.36285	1.1603	0	0.518669	0	0	0.920857	3.34005	0.0791433
hsa-piR-15181	4.00729	11.0357	12.5092	4.40914	0	2.07468	0.671302	0	0.72246	1.47772	0.27754
hsa-piR-15716	0.942892	5.17297	13.3431	0.23206	0	0	6.04172	3.84074	0.608043	1.08313	0.391957
hsa-piR-23246	9.66465	5.8627	7.50552	6.9618	1.07115	0	0.335651	0	0.959463	4.81451	0.0405365
hsa-piR-25077	1.17862	2.41405	0.555964	0.92824	0	0.518669	0	0	0.948158	4.2193	0.0518425
hsa-piR-26918	10.6075	12.0703	14.0381	3.71296	0.535575	1.03734	1.67826	0	0.923545	3.40579	0.0764554
hsa-piR-28033	8.95748	2.41405	1.94587	17.4045	9.64034	4.14935	0		0.927297	3.50336	0.0727027
hsa-piR-28345	1.41434	6.8973	5.97661	18.5648	0	0	0	4.88822	0.944625	4.07099	0.0553749
hsa-piR-28763	28.5225	59.3167	14.5941	22.9739	2.1423	2.07468	0.335651	0	0.701336	1.39141	0.298664
hsa-piR-32829	0.471446	0	0.277982	0	3.21345	0	0	0	0.822347	2.04394	0.177653
hsa-piR-32858	3.77157	15.1741	5.14267	4.6412	0	2.07468	0	0	0.994396	13.3018	0.00560421
hsa-piR-32908	57.7522	85.5265	18.4858	24.5984	0	0.518669	0	0	0.832845	2.12793	0.167155
hsa-piR-32915	59.6379	27.934	52.3996	462.96	154.245	93.3605	89.2832	196.925	0.840394	2.19289	0.159606
hsa-piR-32971	2.35723	1.37946	4.5867	0.92824	2.1423	0	1.67826	0	0.715148	1.44694	0.284852
hsa-piR-32994	15.322	46.2119	5.69863	21.1175	5.35575	7.26137	5.37042	4.53906	0.777137	1.74636	0.222863
hsa-piR-33008	1.41434	1.03459	1.11193	0.46412	2.1423	0	0	0	0.685596	1.33187	0.314404
hsa-piR-33188	0	1.37946	0.833946	1.85648	0	0	1.3426	5.58654	0.702157	1.39462	0.297843
hsa-piR-33195	0.235723	1.72432	0.138991	1.39236	0	2.07468	0	0.349159	0.813359	1.97721	0.186641
hsa-piR-9137	5.18591	3.10378	10.7023	14.8518	0	0	3.02086	7.33233	0.966623	5.33565	0.0333771
